# Supplementary material
Source: Springer Nature journal article supplement (https://www.springermedizin.de/resource/supplementary/12893_2010_178_MOESM1_ESM.pdf/9511736)

# Oesophageal perforations at Lund University Hospital

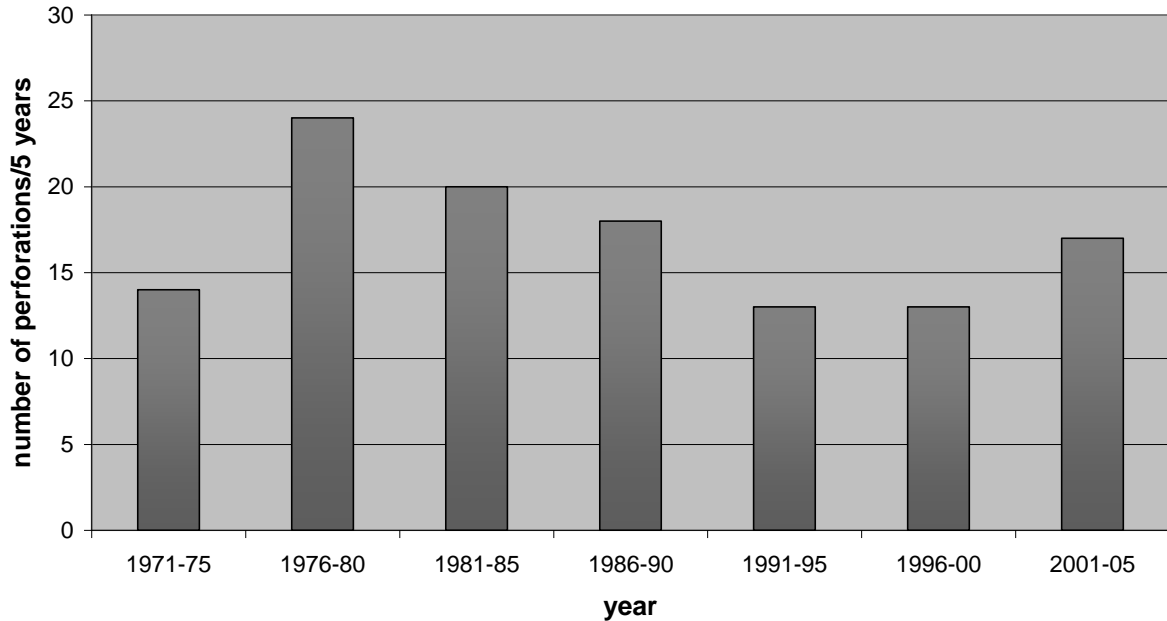

Supplement: MOESM1 [file 9511736]
